# Supplementary material for: An Evaluation of Different Target Enrichment Methods in Pooled Sequencing Designs for Complex Disease Association Studies
Source: PLOS journal article supplement (doi:10.1371/journal.pone.0026279), 2011-11-01
Supplement: S43 (10.1371/journal.pone.0026279.s043) [file journal.pone.0026279.s043]

| Gene           | Chr | NON-COD BP                      | COD BP                     | Total BP  |
|----------------|-----|---------------------------------|----------------------------|-----------|
| <i>BMPR1B</i>  | 4   | 498,965                         | 1,509                      | 500,474   |
| <i>HAPLN1</i>  | 5   | 178,890                         | 1,065                      | 179,955   |
| <i>EFHA2</i>   | 8   | 193,807                         | 1,593                      | 195,400   |
| <i>CPN1</i>    | 10  | 138,201                         | 1,377                      | 139,578   |
| <i>GALNTL4</i> | 11  | 449,306                         | 1,824                      | 451,130   |
| <i>KCNJ15</i>  | 21  | 143,955                         | 1,128                      | 145,083   |
| Total Mb       |     | 1,603,124 (99.47%) <sup>a</sup> | 8,496 (0.52%) <sup>a</sup> | 1,611,614 |

a: percentage of total target region

**Table S3: Target regions for enrichment.** These 6 genomic regions were selected for sequence enrichment on the basis of preliminary rare variant association to Type 2 Diabetes. The target regions include 50Kb upstream and down stream of the translation start and stop sites for each gene, and include both protein coding (COD) and non-coding (NON-COD) sequence.
