# Supplementary material for: An Evaluation of Different Target Enrichment Methods in Pooled Sequencing Designs for Complex Disease Association Studies
Source: PLOS journal article supplement (doi:10.1371/journal.pone.0026279), 2011-11-01
Supplement: S53 (10.1371/journal.pone.0026279.s053) [file journal.pone.0026279.s053]

|            | Pool of<br>1 | Pool of<br>10 | Pool of<br>50 |
|------------|--------------|---------------|---------------|
| <b>PCR</b> | 1938         | 8100          | 19541         |
| <b>sHC</b> | 2742         | 7478          | 13923         |

**Table S13: Total number of variants called by pool and enrichment technique before duplicate removal.** For each pool size and sequence enrichment method this table details the total number of variants called from the sequencing data.
