# Supplementary material for: An Evaluation of Different Target Enrichment Methods in Pooled Sequencing Designs for Complex Disease Association Studies
Source: PLOS journal article supplement (doi:10.1371/journal.pone.0026279), 2011-11-01
Supplement: S65 (10.1371/journal.pone.0026279.s065) [file journal.pone.0026279.s065]

|                         | Pool<br>of 10 | Pool<br>of 50 |
|-------------------------|---------------|---------------|
| PCR (1938) <sup>a</sup> | 80.08         | 85.81         |
| sHC (2742) <sup>a</sup> | 98.72         | 98.80         |

a: The number of variants called in Pool of 1

**Table S25: Variation detection sensitivity as pool size grows before duplicate removal.** This table shows the percentage of the variants called in the pool of 1 individual that are also called as variants in the larger pool sizes. The individual in the pool of 1 was also in each subsequent larger pool, therefore all variants called in the pool of 1 should also be found in all subsequent pools.
